# Supplementary material for: Derlin-1 Deficiency Is Embryonic Lethal, Derlin-3 Deficiency Appears Normal, and Herp Deficiency Is Intolerant to Glucose Load and Ischemia in Mice
Source: PubMed Central journal article supplement (PMC3315519; doi:10.1371/journal.pone.0034298), 2012-03-29
Supplement: pone.0034298.s002.pdf [file pone.0034298.s002.pdf]

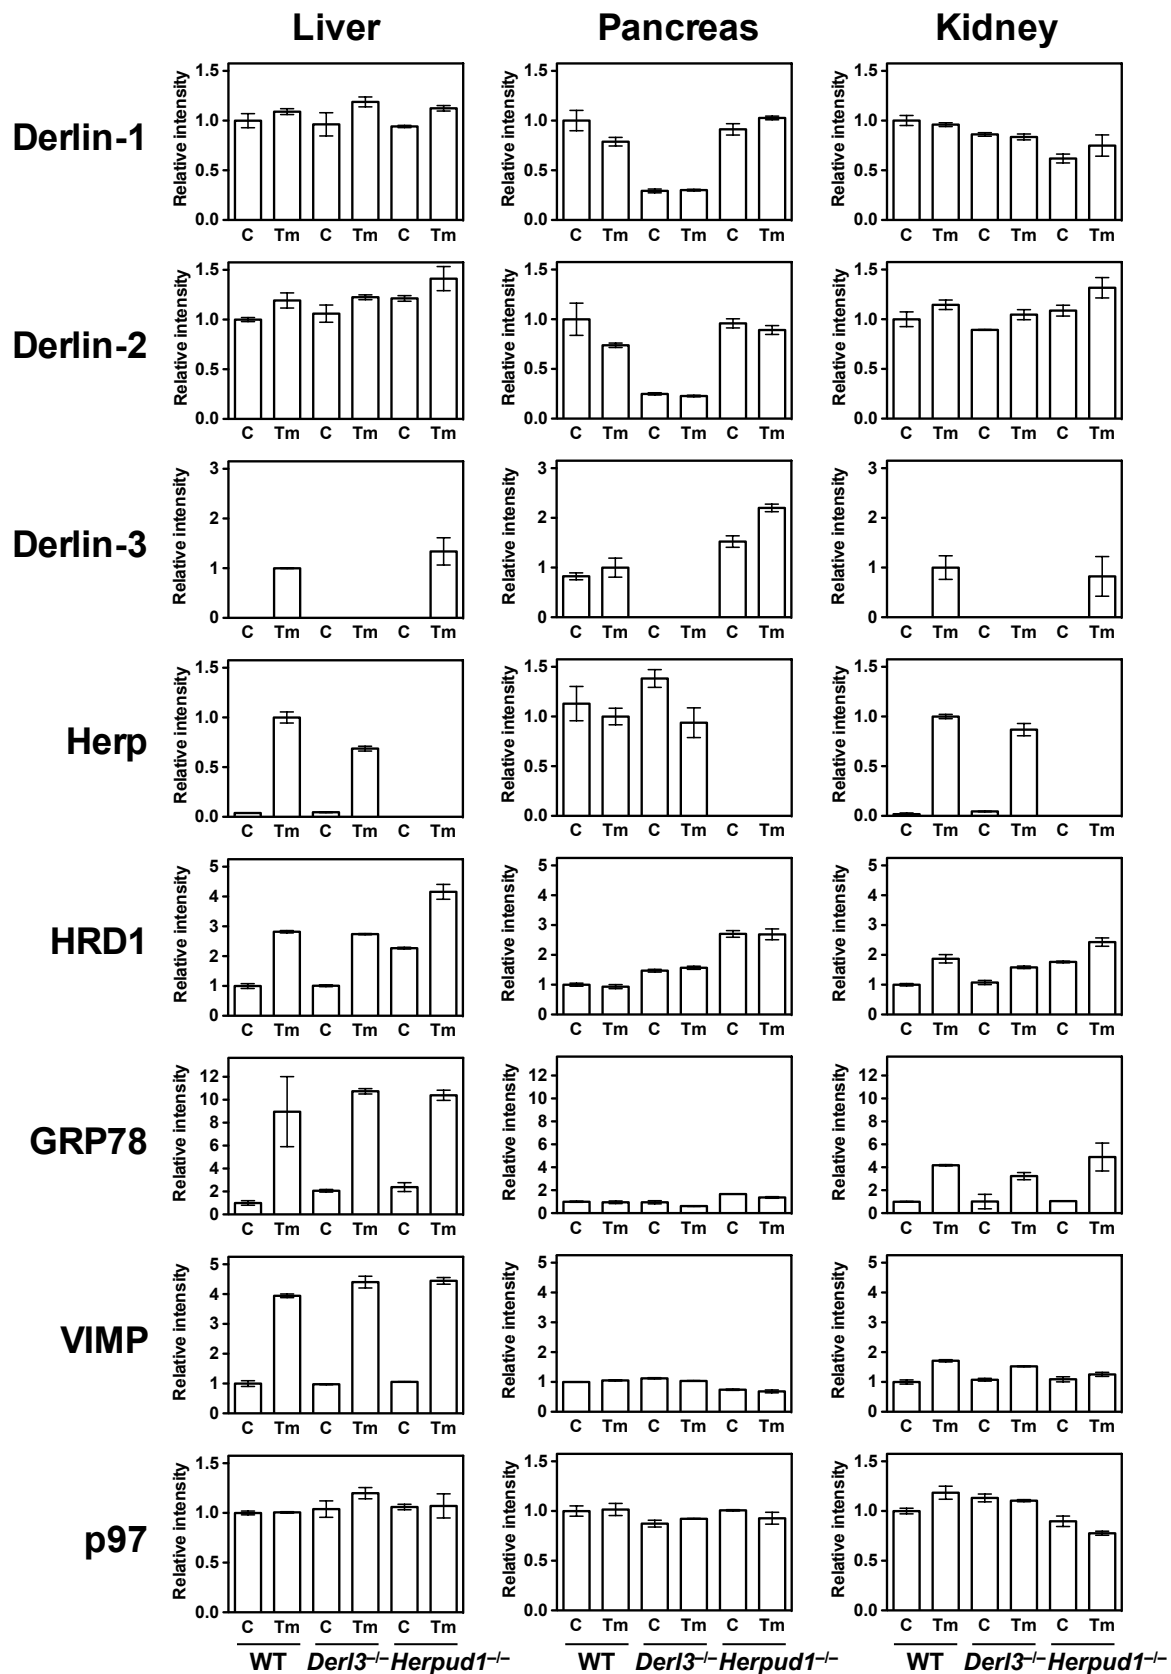

**Figure S2. Western blotting analysis of liver, pancreas, and kidneys from wild-type (WT), *Derl3*<sup>-/-</sup>, and *Herpud1*<sup>-/-</sup> mice.** Mice were intraperitoneally injected with PBS as control (C) or tunicamycin (Tm) 12 h before sacrifice. Liver, pancreas, and kidney homogenates were subjected to Western blotting using the indicated antibodies. Band intensities were normalized to the mean intensity of PBS-injected WT mice (for samples other than Derlin-3 and Herp) or Tm-injected WT mice (for Derlin-3 and Herp). Data are expressed as means with range ( $n = 2$ ). The original blots are shown in Fig. 3.
