# Supplementary material for: Derlin-1 Deficiency Is Embryonic Lethal, Derlin-3 Deficiency Appears Normal, and Herp Deficiency Is Intolerant to Glucose Load and Ischemia in Mice
Source: PubMed Central journal article supplement (PMC3315519; doi:10.1371/journal.pone.0034298), 2012-03-29
Supplement: pone.0034298.s003.pdf [file pone.0034298.s003.pdf]

**Table S1.** Primer sequences for genotyping PCR and RT-PCR.

## Genotyping PCR

| Gene      | Forward               | Reverse                | Product (bp) |
|-----------|-----------------------|------------------------|--------------|
| Derlin-1  | ACCAGAGTTATGGGTGACTGT | TGTGCATTTCCACATACTTTC  | 525          |
| Derlin-1* | ACCAGAGTTATGGGTGACTGT | CTTCCTCGTGCTTTACGGTATC | 446          |
| Derlin-3  | TCTGGACCATGATAGACAGTG | GAAAAGAACCAATAGCAAGGA  | 393          |
| Derlin-3* | TCTGGACCATGATAGACAGTG | CTTCCTCGTGCTTTACGGTATC | 423          |
| Herp      | CCCCTCCCCCTTTGGTTGACA | TCCAGGGGCTTAGACGCTTAC  | 343          |
| Herp*     | CCCCTCCCCCTTTGGTTGACA | TGGACCTGGGAGTGGACACCT  | 252          |

\* Targeted alleles.

## RT-PCR

| Gene     | Forward               | Reverse               | Product (bp) |
|----------|-----------------------|-----------------------|--------------|
| XBP1     | GATCCTGACGAGGTTCCAGAG | AAGATGTTCTGGGGAGGTGAC | 140, 114     |
| Derlin-1 | TCATGTCCCCAGAGTTGCAG  | AACACACATCCGCAACGAGG  | 547          |
| Derlin-2 | CAACCCACTACCTGAAGAGC  | CCATTTACACCACGGCCTTG  | 412          |
| Derlin-3 | CAAGAGACTGCTGCTGACCC  | GATTCCTGTTGACTGGGCTG  | 367          |
| Herp     | ATCTCTAGGCCTGAGGCTGTC | GCAGTGGCAGCTAAGTATTGC | 146          |
| HRD1     | CTTCCCCACCAATTCCTGAAG | AGTTCTGCAGCATCAGGCTCT | 100          |
| GRP78    | TCTCAGCATCAAGCAAGGATT | CTTCATGGTAGAGCGGAACAG | 120          |
| GAPDH    | AGAAACCTGCCAAGTATGATG | CTGTAGCCGTATTCATTGTCA | 214          |
